# Supplementary material
Source: PubMed Central journal article supplement (PMC3167684)
Supplement: supp_msr029_supplement.pdf [file supp_msr029_supplement.pdf]

## Figure S1

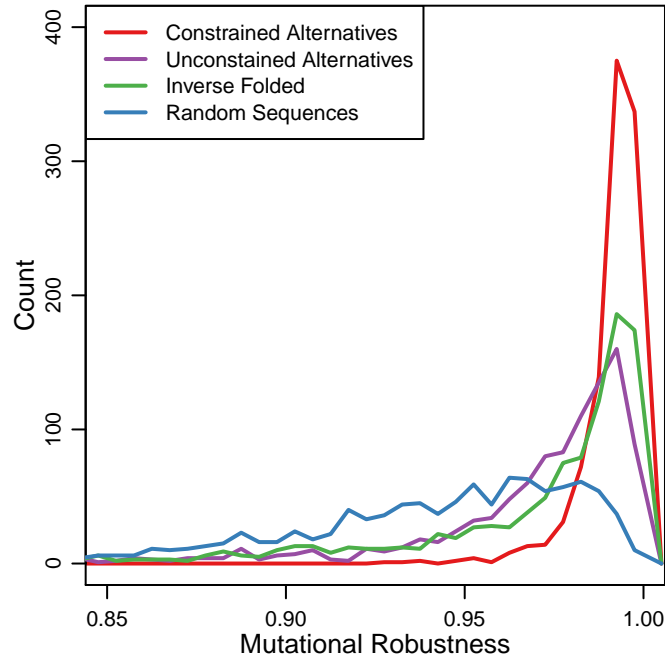

Four null distributions were generated for *dps-mir-317*. As described in Methods, constrained alternatives are simulated descendants of the inferred ancestor of *dps-mir-317* that have the same structure as *dps-mir-317*. Unconstrained alternatives are simulated descendants with any structure. Inverse folded are random sequences that fold into the same structure following the method of Szöllosi and Derényi (2009). Random sequences have the same length as *dps-mir-317* and residues drawn with equal frequencies.

## Figure S2

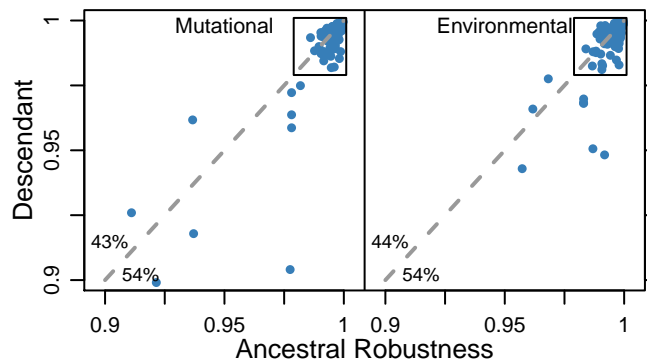

A version of Fig. 3 showing the outlying points and the regions shown in Fig. 3.

**Figure S3**

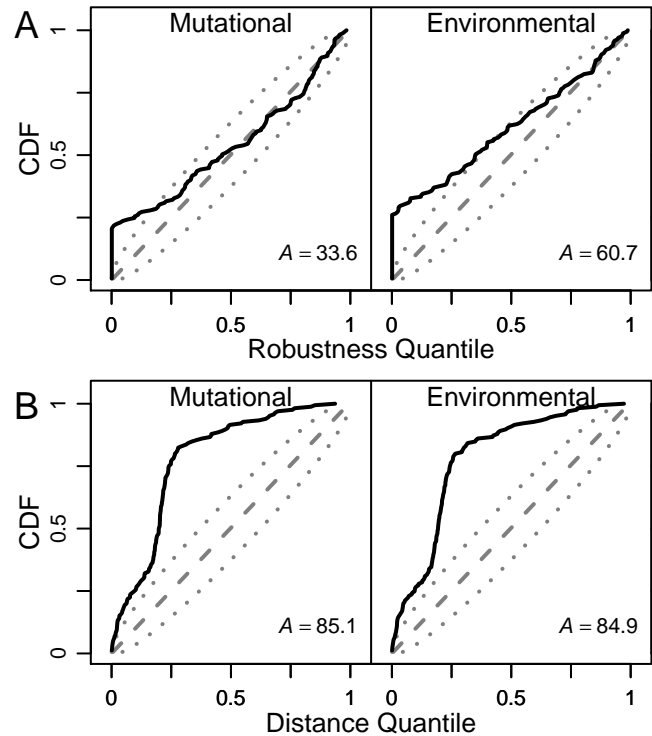

Test of the “inverted” selection hypothesis (see Results). We constructed a new null distribution of descendant pre-miRNA sequences. We took the structure-unconstrained set (Fig. 5) and removed the sequences with robustness lower than the median robustness (left panels  $r_m$ ; right panels  $r_e$ ). These null distributions, containing  $\approx 500$  sequences each, simulate strong directional selection for robustness in the absence of selection for structure. We find that such selection for mutational robustness would cause an overall increase in robustness (A), which we did not observe in our real dataset (Fig. 3). Additionally, such selection would still be insufficient to account for the lack of change in structure shown in Fig. 5B (B).

**Figure S4**

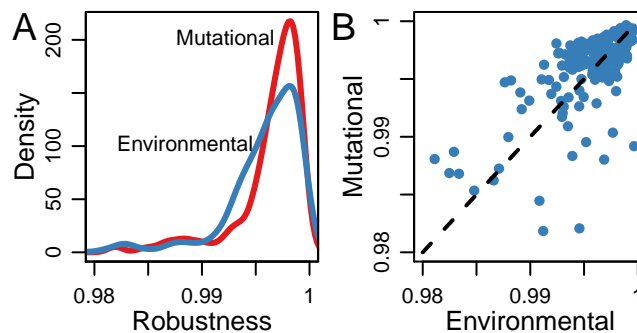

Mutational and environmental are skewed and correlated. (A) Distributions of mutational and environmental robustness for 221 natural pre-miRNAs. (B) Pairwise comparisons of mutational and environmental robustness of these sequences. (Spearman's rank correlation,  $\rho = 0.729$ ).

## Table S1: Results of Constrained Simulations

As described in Methods, we downloaded micro-RNA sequences from *Drosophila* species and estimated their ancestral sequences. For branches that had at least 1 substitution and no indels, we measured the mutational and environmental robustness of its ancestor and descendant and calculated the quantile of each descendant robustness with respect to a null distribution created by “replaying the tape” of evolution from its ancestor.

**Sub:** number of substitutions between ancestor and descendant; ‘–’ means that the branch contained indels. **Samp:** Number of samples in constrained null distribution. **Uniq:** Number of unique values of this robustness. **Anc:** Ancestral robustness **Desc:** Descendant robustness **Quant:** Quantile of descendant robustness with respect to constrained null.

| micro-RNA     |     |      | Mutational Robustness |          |          |       | Environmental Robustness |          |          |       |
|---------------|-----|------|-----------------------|----------|----------|-------|--------------------------|----------|----------|-------|
|               | Sub | Samp | Uniq                  | Anc      | Desc     | Quant | Uniq                     | Anc      | Desc     | Quant |
| bantam-dan    | 1   | 58   | 47                    | 0.997724 | 0.997724 | 0.578 | 52                       | 0.996682 | 0.996651 | 0.431 |
| bantam-der    | 0   |      |                       |          |          |       |                          |          |          |       |
| bantam-dgr    | 1   | 2    | 2                     | 0.997724 | 0.995131 | 0.250 | 2                        | 0.996687 | 0.996698 | 1.000 |
| bantam-dme    | 0   |      |                       |          |          |       |                          |          |          |       |
| bantam-dmo    | –   |      |                       |          |          |       |                          |          |          |       |
| bantam-dpe    | 0   |      |                       |          |          |       |                          |          |          |       |
| bantam-dps    | 0   |      |                       |          |          |       |                          |          |          |       |
| bantam-dse    | 0   |      |                       |          |          |       |                          |          |          |       |
| bantam-dsi    | 0   |      |                       |          |          |       |                          |          |          |       |
| bantam-dvi    | 1   | 2    | 2                     | 0.997724 | 0.997667 | 0.750 | 2                        | 0.996681 | 0.99669  | 1.000 |
| bantam-dwi    | 0   |      |                       |          |          |       |                          |          |          |       |
| bantam-dya    | 0   |      |                       |          |          |       |                          |          |          |       |
| let-7-dan     | 5   | 1000 | 859                   | 0.99875  | 0.997156 | 0.319 | 843                      | 0.99826  | 0.998804 | 0.878 |
| let-7-der     | 0   |      |                       |          |          |       |                          |          |          |       |
| let-7-dme     | 0   |      |                       |          |          |       |                          |          |          |       |
| let-7-dmo     | 1   | 65   | 60                    | 0.998725 | 0.999121 | 0.946 | 56                       | 0.998793 | 0.998681 | 0.292 |
| let-7-dps     | –   |      |                       |          |          |       |                          |          |          |       |
| let-7-dse     | 0   |      |                       |          |          |       |                          |          |          |       |
| let-7-dsi     | 0   |      |                       |          |          |       |                          |          |          |       |
| let-7-dvi     | 1   | 2    | 2                     | 0.998725 | 0.998249 | 0.250 | 2                        | 0.998791 | 0.99839  | 0.500 |
| let-7-dwi     | –   |      |                       |          |          |       |                          |          |          |       |
| let-7-dya     | 0   |      |                       |          |          |       |                          |          |          |       |
| mir-iab-4-dan | 0   |      |                       |          |          |       |                          |          |          |       |
| mir-iab-4-der | 0   |      |                       |          |          |       |                          |          |          |       |
| mir-iab-4-dgr | 0   |      |                       |          |          |       |                          |          |          |       |
| mir-iab-4-dme | 0   |      |                       |          |          |       |                          |          |          |       |
| mir-iab-4-dmo | 0   |      |                       |          |          |       |                          |          |          |       |
| mir-iab-4-dpe | 0   |      |                       |          |          |       |                          |          |          |       |
| mir-iab-4-dps | 0   |      |                       |          |          |       |                          |          |          |       |
| mir-iab-4-dse | 0   |      |                       |          |          |       |                          |          |          |       |
| mir-iab-4-dsi | 0   |      |                       |          |          |       |                          |          |          |       |
| mir-iab-4-dvi | 0   |      |                       |          |          |       |                          |          |          |       |
| mir-iab-4-dwi | 1   | 1    | 1                     | 0.991587 | 0.984463 | 0.500 | 1                        | 0.992965 | 0.990852 | 0.000 |
| mir-iab-4-dya | 0   |      |                       |          |          |       |                          |          |          |       |
| mir-1-dan     | –   |      |                       |          |          |       |                          |          |          |       |
| mir-1-der     | –   |      |                       |          |          |       |                          |          |          |       |
| mir-1-dgr     | –   |      |                       |          |          |       |                          |          |          |       |
| mir-1-dme     | –   |      |                       |          |          |       |                          |          |          |       |
| mir-1-dmo     | 2   | 12   | 12                    | 0.998449 | 0.998074 | 0.375 | 12                       | 0.996504 | 0.996255 | 0.583 |
| mir-1-dpe     | –   |      |                       |          |          |       |                          |          |          |       |
| mir-1-dps     | 0   |      |                       |          |          |       |                          |          |          |       |
| mir-1-dse     | 0   |      |                       |          |          |       |                          |          |          |       |
| mir-1-dsi     | 0   |      |                       |          |          |       |                          |          |          |       |
| mir-1-dvi     | –   |      |                       |          |          |       |                          |          |          |       |

| micro-RNA    | Sub | Samp | Mutational Robustness |          |          |       | Environmental Robustness |          |          |       |
|--------------|-----|------|-----------------------|----------|----------|-------|--------------------------|----------|----------|-------|
|              |     |      | Uniq                  | Anc      | Desc     | Quant | Uniq                     | Anc      | Desc     | Quant |
| mir-1-dwi    | -   |      |                       |          |          |       |                          |          |          |       |
| mir-1-dya    | 0   |      |                       |          |          |       |                          |          |          |       |
| mir-2a-1-dan | -   |      |                       |          |          |       |                          |          |          |       |
| mir-2a-1-der | 2   | 72   | 63                    | 0.998805 | 0.998921 | 0.465 | 67                       | 0.996629 | 0.998443 | 0.708 |
| mir-2a-1-dgr | 0   |      |                       |          |          |       |                          |          |          |       |
| mir-2a-1-dme | 0   |      |                       |          |          |       |                          |          |          |       |
| mir-2a-1-dmo | 4   | 1000 | 615                   | 0.998297 | 0.99845  | 0.360 | 756                      | 0.997813 | 0.99728  | 0.196 |
| mir-2a-1-dpe | 0   |      |                       |          |          |       |                          |          |          |       |
| mir-2a-1-dps | 0   |      |                       |          |          |       |                          |          |          |       |
| mir-2a-1-dse | 0   |      |                       |          |          |       |                          |          |          |       |
| mir-2a-1-dsi | 0   |      |                       |          |          |       |                          |          |          |       |
| mir-2a-1-dvi | -   |      |                       |          |          |       |                          |          |          |       |
| mir-2a-1-dwi | 9   | 666  | 587                   | 0.999014 | 0.998908 | 0.766 | 630                      | 0.999029 | 0.998906 | 0.733 |
| mir-2a-1-dya | 0   |      |                       |          |          |       |                          |          |          |       |
| mir-2a-2-dan | 0   |      |                       |          |          |       |                          |          |          |       |
| mir-2a-2-der | 0   |      |                       |          |          |       |                          |          |          |       |
| mir-2a-2-dgr | 0   |      |                       |          |          |       |                          |          |          |       |
| mir-2a-2-dme | 0   |      |                       |          |          |       |                          |          |          |       |
| mir-2a-2-dmo | 0   |      |                       |          |          |       |                          |          |          |       |
| mir-2a-2-dpe | 0   |      |                       |          |          |       |                          |          |          |       |
| mir-2a-2-dps | 0   |      |                       |          |          |       |                          |          |          |       |
| mir-2a-2-dse | 0   |      |                       |          |          |       |                          |          |          |       |
| mir-2a-2-dsi | 0   |      |                       |          |          |       |                          |          |          |       |
| mir-2a-2-dvi | 0   |      |                       |          |          |       |                          |          |          |       |
| mir-2a-2-dwi | 0   |      |                       |          |          |       |                          |          |          |       |
| mir-2a-2-dya | 0   |      |                       |          |          |       |                          |          |          |       |
| mir-2c-dan   | -   |      |                       |          |          |       |                          |          |          |       |
| mir-2c-der   | 0   |      |                       |          |          |       |                          |          |          |       |
| mir-2c-dgr   | -   |      |                       |          |          |       |                          |          |          |       |
| mir-2c-dme   | 0   |      |                       |          |          |       |                          |          |          |       |
| mir-2c-dmo   | -   |      |                       |          |          |       |                          |          |          |       |
| mir-2c-dpe   | 0   |      |                       |          |          |       |                          |          |          |       |
| mir-2c-dps   | 0   |      |                       |          |          |       |                          |          |          |       |
| mir-2c-dse   | 0   |      |                       |          |          |       |                          |          |          |       |
| mir-2c-dsi   | 0   |      |                       |          |          |       |                          |          |          |       |
| mir-2c-dvi   | 0   |      |                       |          |          |       |                          |          |          |       |
| mir-2c-dwi   | -   |      |                       |          |          |       |                          |          |          |       |
| mir-2c-dya   | 0   |      |                       |          |          |       |                          |          |          |       |
| mir-3-dan    | 11  | 324  | 317                   | 0.993829 | 0.99634  | 0.352 | 317                      | 0.996373 | 0.998185 | 0.525 |
| mir-3-der    | 1   | 58   | 48                    | 0.999209 | 0.999195 | 0.543 | 48                       | 0.999113 | 0.999113 | 0.569 |
| mir-3-dme    | 0   |      |                       |          |          |       |                          |          |          |       |
| mir-3-dmo    | 7   | 844  | 828                   | 0.998122 | 0.997725 | 0.998 | 827                      | 0.99674  | 0.995662 | 0.882 |
| mir-3-dpe    | 0   |      |                       |          |          |       |                          |          |          |       |
| mir-3-dps    | 0   |      |                       |          |          |       |                          |          |          |       |
| mir-3-dse    | 0   |      |                       |          |          |       |                          |          |          |       |
| mir-3-dsi    | 1   | 58   | 47                    | 0.999209 | 0.999208 | 0.586 | 46                       | 0.999111 | 0.999111 | 0.500 |
| mir-3-dvi    | 5   | 1000 | 966                   | 0.998122 | 0.985339 | 0.412 | 972                      | 0.996741 | 0.984785 | 0.312 |
| mir-3-dwi    | -   |      |                       |          |          |       |                          |          |          |       |
| mir-3-dya    | 1   | 58   | 48                    | 0.999209 | 0.999339 | 0.991 | 49                       | 0.999113 | 0.999116 | 0.698 |
| mir-4-dan    | 0   |      |                       |          |          |       |                          |          |          |       |
| mir-4-der    | 0   |      |                       |          |          |       |                          |          |          |       |
| mir-4-dme    | 2   | 126  | 122                   | 0.995025 | 0.997542 | 0.194 | 112                      | 0.991995 | 0.996676 | 0.206 |
| mir-4-dmo    | 0   |      |                       |          |          |       |                          |          |          |       |
| mir-4-dpe    | 0   |      |                       |          |          |       |                          |          |          |       |
| mir-4-dps    | 0   |      |                       |          |          |       |                          |          |          |       |

| micro-RNA   | Sub | Samp | Mutational Robustness |          |          |       | Environmental Robustness |          |          |       |
|-------------|-----|------|-----------------------|----------|----------|-------|--------------------------|----------|----------|-------|
|             |     |      | Uniq                  | Anc      | Desc     | Quant | Uniq                     | Anc      | Desc     | Quant |
| mir-4-dse   | 0   |      |                       |          |          |       |                          |          |          |       |
| mir-4-dsi   | 0   |      |                       |          |          |       |                          |          |          |       |
| mir-4-dvi   | 0   |      |                       |          |          |       |                          |          |          |       |
| mir-4-dwi   | 0   |      |                       |          |          |       |                          |          |          |       |
| mir-4-dya   | 0   |      |                       |          |          |       |                          |          |          |       |
| mir-5-dan   | –   |      |                       |          |          |       |                          |          |          |       |
| mir-5-der   | 0   |      |                       |          |          |       |                          |          |          |       |
| mir-5-dme   | 1   | 65   | 57                    | 0.997389 | 0.997332 | 0.315 | 61                       | 0.996036 | 0.995801 | 0.200 |
| mir-5-dmo   | 1   | 16   | 16                    | 0.996689 | 0.995676 | 0.031 | 16                       | 0.995875 | 0.995801 | 0.062 |
| mir-5-dpe   | 0   |      |                       |          |          |       |                          |          |          |       |
| mir-5-dps   | 0   |      |                       |          |          |       |                          |          |          |       |
| mir-5-dse   | 1   | 3    | 3                     | 0.997069 | 0.996989 | 0.167 | 3                        | 0.996653 | 0.998036 | 0.000 |
| mir-5-dsi   | –   |      |                       |          |          |       |                          |          |          |       |
| mir-5-dvi   | –   |      |                       |          |          |       |                          |          |          |       |
| mir-5-dwi   | –   |      |                       |          |          |       |                          |          |          |       |
| mir-5-dya   | 1   | 56   | 50                    | 0.996989 | 0.996817 | 0.116 | 54                       | 0.99694  | 0.996803 | 0.179 |
| mir-6-1-dan | –   |      |                       |          |          |       |                          |          |          |       |
| mir-6-1-der | 1   | 5    | 5                     | 0.997701 | 0.997445 | 0.900 | 5                        | 0.996267 | 0.996245 | 0.800 |
| mir-6-1-dgr | 5   | 1000 | 965                   | 0.990466 | 0.987244 | 0.285 | 964                      | 0.990193 | 0.98709  | 0.112 |
| mir-6-1-dme | 1   | 93   | 84                    | 0.997463 | 0.997492 | 0.699 | 93                       | 0.994463 | 0.993908 | 0.258 |
| mir-6-1-dmo | –   |      |                       |          |          |       |                          |          |          |       |
| mir-6-1-dpe | –   |      |                       |          |          |       |                          |          |          |       |
| mir-6-1-dps | 0   |      |                       |          |          |       |                          |          |          |       |
| mir-6-1-dse | 0   |      |                       |          |          |       |                          |          |          |       |
| mir-6-1-dsi | 2   | 1998 | 1392                  | 0.997649 | 0.996563 | 0.257 | 1524                     | 0.996262 | 0.995226 | 0.268 |
| mir-6-1-dvi | 2   | 24   | 24                    | 0.990466 | 0.993952 | 0.229 | 23                       | 0.990188 | 0.997982 | 0.250 |
| mir-6-1-dwi | –   |      |                       |          |          |       |                          |          |          |       |
| mir-6-1-dya | 5   | 1000 | 907                   | 0.997701 | 0.997755 | 0.747 | 908                      | 0.996275 | 0.996301 | 0.599 |
| mir-6-2-dan | 7   | 1000 | 914                   | 0.997011 | 0.997763 | 0.591 | 929                      | 0.9959   | 0.998937 | 0.933 |
| mir-6-2-der | –   |      |                       |          |          |       |                          |          |          |       |
| mir-6-2-dgr | –   |      |                       |          |          |       |                          |          |          |       |
| mir-6-2-dme | 2   | 9    | 9                     | 0.994417 | 0.994827 | 0.167 | 9                        | 0.997543 | 0.997314 | 0.333 |
| mir-6-2-dmo | 5   | 196  | 193                   | 0.996459 | 0.992893 | 0.209 | 192                      | 0.99534  | 0.996163 | 0.883 |
| mir-6-2-dpe | –   |      |                       |          |          |       |                          |          |          |       |
| mir-6-2-dps | –   |      |                       |          |          |       |                          |          |          |       |
| mir-6-2-dse | 0   |      |                       |          |          |       |                          |          |          |       |
| mir-6-2-dsi | 0   |      |                       |          |          |       |                          |          |          |       |
| mir-6-2-dvi | –   |      |                       |          |          |       |                          |          |          |       |
| mir-6-2-dwi | –   |      |                       |          |          |       |                          |          |          |       |
| mir-6-2-dya | 3   | 1000 | 194                   | 0.994224 | 0.989537 | 0.340 | 798                      | 0.997416 | 0.99519  | 0.177 |
| mir-6-3-dan | –   |      |                       |          |          |       |                          |          |          |       |
| mir-6-3-der | 1   | 4    | 4                     | 0.997212 | 0.997247 | 0.875 | 4                        | 0.996602 | 0.997172 | 0.750 |
| mir-6-3-dgr | –   |      |                       |          |          |       |                          |          |          |       |
| mir-6-3-dme | 1   | 2    | 2                     | 0.997212 | 0.99605  | 0.250 | 2                        | 0.996597 | 0.994491 | 0.500 |
| mir-6-3-dmo | 8   | 506  | 492                   | 0.993334 | 0.994931 | 0.597 | 493                      | 0.99393  | 0.99602  | 0.453 |
| mir-6-3-dpe | –   |      |                       |          |          |       |                          |          |          |       |
| mir-6-3-dps | 1   | 7    | 7                     | 0.99291  | 0.997044 | 0.929 | 7                        | 0.99229  | 0.995941 | 0.286 |
| mir-6-3-dse | 0   |      |                       |          |          |       |                          |          |          |       |
| mir-6-3-dsi | 0   |      |                       |          |          |       |                          |          |          |       |
| mir-6-3-dvi | –   |      |                       |          |          |       |                          |          |          |       |
| mir-6-3-dwi | –   |      |                       |          |          |       |                          |          |          |       |
| mir-6-3-dya | 2   | 137  | 121                   | 0.997212 | 0.998215 | 0.931 | 129                      | 0.996605 | 0.996362 | 0.409 |
| mir-7-dan   | –   |      |                       |          |          |       |                          |          |          |       |
| mir-7-der   | 1   | 53   | 53                    | 0.994738 | 0.994875 | 0.689 | 53                       | 0.988211 | 0.988211 | 0.396 |
| mir-7-dgr   | –   |      |                       |          |          |       |                          |          |          |       |

| micro-RNA  | Sub | Samp | Mutational Robustness |          |          |       | Environmental Robustness |          |          |       |
|------------|-----|------|-----------------------|----------|----------|-------|--------------------------|----------|----------|-------|
|            |     |      | Uniq                  | Anc      | Desc     | Quant | Uniq                     | Anc      | Desc     | Quant |
| mir-7-dme  | 0   |      |                       |          |          |       |                          |          |          |       |
| mir-7-dmo  | 3   | 1000 | 443                   | 0.989602 | 0.989976 | 0.515 | 792                      | 0.986977 | 0.987963 | 0.474 |
| mir-7-dpe  | 0   |      |                       |          |          |       |                          |          |          |       |
| mir-7-dps  | 0   |      |                       |          |          |       |                          |          |          |       |
| mir-7-dse  | 0   |      |                       |          |          |       |                          |          |          |       |
| mir-7-dsi  | 0   |      |                       |          |          |       |                          |          |          |       |
| mir-7-dvi  | –   |      |                       |          |          |       |                          |          |          |       |
| mir-7-dwi  | –   |      |                       |          |          |       |                          |          |          |       |
| mir-7-dya  | 1   | 53   | 53                    | 0.994738 | 0.994713 | 0.425 | 52                       | 0.988221 | 0.98763  | 0.113 |
| mir-8-dan  | 1   | 65   | 59                    | 0.998604 | 0.998149 | 0.208 | 63                       | 0.9964   | 0.996261 | 0.269 |
| mir-8-der  | 0   |      |                       |          |          |       |                          |          |          |       |
| mir-8-dgr  | 0   |      |                       |          |          |       |                          |          |          |       |
| mir-8-dme  | 0   |      |                       |          |          |       |                          |          |          |       |
| mir-8-dmo  | –   |      |                       |          |          |       |                          |          |          |       |
| mir-8-dpe  | 0   |      |                       |          |          |       |                          |          |          |       |
| mir-8-dps  | 0   |      |                       |          |          |       |                          |          |          |       |
| mir-8-dse  | 1   | 68   | 57                    | 0.998847 | 0.998842 | 0.566 | 65                       | 0.997311 | 0.997131 | 0.213 |
| mir-8-dsi  | 0   |      |                       |          |          |       |                          |          |          |       |
| mir-8-dvi  | 0   |      |                       |          |          |       |                          |          |          |       |
| mir-8-dwi  | –   |      |                       |          |          |       |                          |          |          |       |
| mir-8-dya  | 0   |      |                       |          |          |       |                          |          |          |       |
| mir-9a-dan | 0   |      |                       |          |          |       |                          |          |          |       |
| mir-9a-der | 0   |      |                       |          |          |       |                          |          |          |       |
| mir-9a-dgr | 0   |      |                       |          |          |       |                          |          |          |       |
| mir-9a-dme | 0   |      |                       |          |          |       |                          |          |          |       |
| mir-9a-dmo | 0   |      |                       |          |          |       |                          |          |          |       |
| mir-9a-dpe | 0   |      |                       |          |          |       |                          |          |          |       |
| mir-9a-dps | 0   |      |                       |          |          |       |                          |          |          |       |
| mir-9a-dse | 0   |      |                       |          |          |       |                          |          |          |       |
| mir-9a-dsi | 0   |      |                       |          |          |       |                          |          |          |       |
| mir-9a-dvi | 0   |      |                       |          |          |       |                          |          |          |       |
| mir-9a-dwi | 1   | 71   | 62                    | 0.998487 | 0.998487 | 0.563 | 64                       | 0.999074 | 0.999028 | 0.521 |
| mir-9b-dan | –   |      |                       |          |          |       |                          |          |          |       |
| mir-9b-der | –   |      |                       |          |          |       |                          |          |          |       |
| mir-9b-dgr | 4   | 1000 | 820                   | 0.999512 | 0.998999 | 0.679 | 766                      | 0.999174 | 0.99791  | 0.222 |
| mir-9b-dme | 3   | 1000 | 576                   | 0.999581 | 0.999403 | 0.417 | 751                      | 0.998989 | 0.998375 | 0.261 |
| mir-9b-dmo | 2   | 3051 | 1183                  | 0.999512 | 0.999536 | 0.778 | 1239                     | 0.999169 | 0.998938 | 0.263 |
| mir-9b-dpe | 0   |      |                       |          |          |       |                          |          |          |       |
| mir-9b-dps | 0   |      |                       |          |          |       |                          |          |          |       |
| mir-9b-dse | –   |      |                       |          |          |       |                          |          |          |       |
| mir-9b-dvi | 0   |      |                       |          |          |       |                          |          |          |       |
| mir-9b-dya | 1   | 77   | 61                    | 0.999656 | 0.999656 | 0.773 | 71                       | 0.998739 | 0.998917 | 0.818 |
| mir-9c-dan | 1   | 79   | 69                    | 0.998558 | 0.998345 | 0.184 | 74                       | 0.996274 | 0.995806 | 0.127 |
| mir-9c-der | 0   |      |                       |          |          |       |                          |          |          |       |
| mir-9c-dgr | 2   | 606  | 551                   | 0.996756 | 0.99668  | 0.301 | 544                      | 0.993476 | 0.997228 | 0.618 |
| mir-9c-dme | 0   |      |                       |          |          |       |                          |          |          |       |
| mir-9c-dmo | 2   | 74   | 67                    | 0.998629 | 0.998635 | 0.845 | 69                       | 0.998023 | 0.996822 | 0.561 |
| mir-9c-dpe | 0   |      |                       |          |          |       |                          |          |          |       |
| mir-9c-dps | 0   |      |                       |          |          |       |                          |          |          |       |
| mir-9c-dse | 0   |      |                       |          |          |       |                          |          |          |       |
| mir-9c-dvi | 1   | 77   | 70                    | 0.998629 | 0.988029 | 0.006 | 71                       | 0.998025 | 0.996872 | 0.091 |
| mir-9c-dya | 0   |      |                       |          |          |       |                          |          |          |       |
| mir-10-dan | 1   | 59   | 54                    | 0.997733 | 0.997726 | 0.449 | 54                       | 0.99764  | 0.997522 | 0.271 |
| mir-10-der | 1   | 59   | 54                    | 0.997733 | 0.997696 | 0.381 | 58                       | 0.997639 | 0.99727  | 0.119 |
| mir-10-dgr | 0   |      |                       |          |          |       |                          |          |          |       |

| micro-RNA     | Sub | Samp | Mutational Robustness |          |          |       | Environmental Robustness |          |          |       |
|---------------|-----|------|-----------------------|----------|----------|-------|--------------------------|----------|----------|-------|
|               |     |      | Uniq                  | Anc      | Desc     | Quant | Uniq                     | Anc      | Desc     | Quant |
| mir-10-dme    | 0   |      |                       |          |          |       |                          |          |          |       |
| mir-10-dmo    | 3   | 1000 | 680                   | 0.997741 | 0.998462 | 0.451 | 639                      | 0.99874  | 0.999129 | 0.409 |
| mir-10-dpe    | 0   |      |                       |          |          |       |                          |          |          |       |
| mir-10-dps    | 0   |      |                       |          |          |       |                          |          |          |       |
| mir-10-dse    | 0   |      |                       |          |          |       |                          |          |          |       |
| mir-10-dsi    | 0   |      |                       |          |          |       |                          |          |          |       |
| mir-10-dvi    | 3   | 1000 | 786                   | 0.997741 | 0.998515 | 0.941 | 832                      | 0.998739 | 0.999043 | 0.897 |
| mir-10-dwi    | –   |      |                       |          |          |       |                          |          |          |       |
| mir-10-dya    | 1   | 59   | 54                    | 0.997733 | 0.997726 | 0.449 | 57                       | 0.997642 | 0.997521 | 0.254 |
| mir-11-dan    | 13  | 0    | 0                     | 0.99623  | 0.996221 | —     | 0                        | 0.99784  | 0.996172 | —     |
| mir-11-der    | 2   | 465  | 373                   | 0.997611 | 0.996937 | 0.271 | 386                      | 0.999501 | 0.998451 | 0.353 |
| mir-11-dgr    | –   |      |                       |          |          |       |                          |          |          |       |
| mir-11-dme    | 0   |      |                       |          |          |       |                          |          |          |       |
| mir-11-dmo    | 4   | 1000 | 962                   | 0.992076 | 0.995974 | 0.522 | 946                      | 0.992164 | 0.993662 | 0.275 |
| mir-11-dpe    | 0   |      |                       |          |          |       |                          |          |          |       |
| mir-11-dps    | 0   |      |                       |          |          |       |                          |          |          |       |
| mir-11-dse    | 0   |      |                       |          |          |       |                          |          |          |       |
| mir-11-dsi    | 0   |      |                       |          |          |       |                          |          |          |       |
| mir-11-dvi    | 0   |      |                       |          |          |       |                          |          |          |       |
| mir-11-dwi    | –   |      |                       |          |          |       |                          |          |          |       |
| mir-11-dya    | 0   |      |                       |          |          |       |                          |          |          |       |
| mir-12-dan    | 1   | 61   | 54                    | 0.998806 | 0.998967 | 0.861 | 53                       | 0.997805 | 0.998154 | 0.852 |
| mir-12-der    | 1   | 61   | 53                    | 0.998806 | 0.998767 | 0.500 | 54                       | 0.997808 | 0.997692 | 0.295 |
| mir-12-dgr    | 0   |      |                       |          |          |       |                          |          |          |       |
| mir-12-dme    | 0   |      |                       |          |          |       |                          |          |          |       |
| mir-12-dmo    | 1   | 62   | 55                    | 0.998825 | 0.998825 | 0.605 | 56                       | 0.998153 | 0.998161 | 0.677 |
| mir-12-dpe    | 0   |      |                       |          |          |       |                          |          |          |       |
| mir-12-dps    | 0   |      |                       |          |          |       |                          |          |          |       |
| mir-12-dse    | 0   |      |                       |          |          |       |                          |          |          |       |
| mir-12-dsi    | 0   |      |                       |          |          |       |                          |          |          |       |
| mir-12-dvi    | 0   |      |                       |          |          |       |                          |          |          |       |
| mir-12-dwi    | 0   |      |                       |          |          |       |                          |          |          |       |
| mir-13a-dan   | 1   | 64   | 55                    | 0.998815 | 0.998917 | 0.883 | 63                       | 0.999028 | 0.999031 | 0.578 |
| mir-13a-der   | 0   |      |                       |          |          |       |                          |          |          |       |
| mir-13a-dgr   | 3   | 213  | 6                     | 0.997626 | 0.994338 | 0.357 | 102                      | 0.997886 | 0.992424 | 0.019 |
| mir-13a-dme   | 0   |      |                       |          |          |       |                          |          |          |       |
| mir-13a-dmo   | 1   | 59   | 56                    | 0.997626 | 0.997769 | 0.839 | 57                       | 0.997886 | 0.998151 | 0.881 |
| mir-13a-dpe   | 0   |      |                       |          |          |       |                          |          |          |       |
| mir-13a-dps   | 0   |      |                       |          |          |       |                          |          |          |       |
| mir-13a-dse   | 0   |      |                       |          |          |       |                          |          |          |       |
| mir-13a-dsi   | 0   |      |                       |          |          |       |                          |          |          |       |
| mir-13a-dvi   | 1   | 59   | 56                    | 0.997626 | 0.997605 | 0.398 | 59                       | 0.997884 | 0.997803 | 0.322 |
| mir-13a-dwi   | –   |      |                       |          |          |       |                          |          |          |       |
| mir-13a-dya   | 1   | 10   | 10                    | 0.998218 | 0.998979 | 0.750 | 10                       | 0.99837  | 0.999431 | 0.700 |
| mir-13b-1-dan | 2   | 51   | 51                    | 0.995893 | 0.994    | 0.814 | 50                       | 0.995415 | 0.994567 | 0.824 |
| mir-13b-1-der | 0   |      |                       |          |          |       |                          |          |          |       |
| mir-13b-1-dgr | 0   |      |                       |          |          |       |                          |          |          |       |
| mir-13b-1-dme | 1   | 50   | 48                    | 0.996639 | 0.996436 | 0.330 | 50                       | 0.995177 | 0.995779 | 0.700 |
| mir-13b-1-dmo | 5   | 1000 | 888                   | 0.996944 | 0.997907 | 0.730 | 954                      | 0.992243 | 0.996392 | 0.608 |
| mir-13b-1-dpe | 0   |      |                       |          |          |       |                          |          |          |       |
| mir-13b-1-dps | 0   |      |                       |          |          |       |                          |          |          |       |
| mir-13b-1-dse | 0   |      |                       |          |          |       |                          |          |          |       |
| mir-13b-1-dsi | 0   |      |                       |          |          |       |                          |          |          |       |
| mir-13b-1-dvi | 0   |      |                       |          |          |       |                          |          |          |       |
| mir-13b-1-dwi | –   |      |                       |          |          |       |                          |          |          |       |

| micro-RNA     | Sub | Samp | Mutational Robustness |          |          |       | Environmental Robustness |          |          |       |
|---------------|-----|------|-----------------------|----------|----------|-------|--------------------------|----------|----------|-------|
|               |     |      | Uniq                  | Anc      | Desc     | Quant | Uniq                     | Anc      | Desc     | Quant |
| mir-13b-1-dya | 0   |      |                       |          |          |       |                          |          |          |       |
| mir-13b-2-dan | –   |      |                       |          |          |       |                          |          |          |       |
| mir-13b-2-der | 3   | 1000 | 856                   | 0.994914 | 0.994966 | 0.576 | 901                      | 0.991738 | 0.991056 | 0.259 |
| mir-13b-2-dgr | 4   | 1000 | 874                   | 0.997119 | 0.998871 | 0.946 | 856                      | 0.998876 | 0.99936  | 0.966 |
| mir-13b-2-dme | –   |      |                       |          |          |       |                          |          |          |       |
| mir-13b-2-dmo | –   |      |                       |          |          |       |                          |          |          |       |
| mir-13b-2-dpe | –   |      |                       |          |          |       |                          |          |          |       |
| mir-13b-2-dps | 0   |      |                       |          |          |       |                          |          |          |       |
| mir-13b-2-dse | 0   |      |                       |          |          |       |                          |          |          |       |
| mir-13b-2-dsi | 0   |      |                       |          |          |       |                          |          |          |       |
| mir-13b-2-dvi | 3   | 1000 | 727                   | 0.997119 | 0.996046 | 0.501 | 897                      | 0.998878 | 0.9969   | 0.804 |
| mir-13b-2-dwi | –   |      |                       |          |          |       |                          |          |          |       |
| mir-13b-2-dya | 1   | 56   | 49                    | 0.994914 | 0.994916 | 0.616 | 51                       | 0.99174  | 0.991729 | 0.554 |
| mir-14-dan    | 0   |      |                       |          |          |       |                          |          |          |       |
| mir-14-der    | 0   |      |                       |          |          |       |                          |          |          |       |
| mir-14-dgr    | 0   |      |                       |          |          |       |                          |          |          |       |
| mir-14-dme    | 0   |      |                       |          |          |       |                          |          |          |       |
| mir-14-dmo    | 1   | 56   | 48                    | 0.998476 | 0.997384 | 0.170 | 46                       | 0.999385 | 0.998784 | 0.054 |
| mir-14-dpe    | 0   |      |                       |          |          |       |                          |          |          |       |
| mir-14-dps    | 0   |      |                       |          |          |       |                          |          |          |       |
| mir-14-dse    | 0   |      |                       |          |          |       |                          |          |          |       |
| mir-14-dsi    | 0   |      |                       |          |          |       |                          |          |          |       |
| mir-14-dvi    | 0   |      |                       |          |          |       |                          |          |          |       |
| mir-14-dwi    | 1   | 4    | 4                     | 0.998476 | 0.998382 | 0.375 | 4                        | 0.999386 | 0.999529 | 0.625 |
| mir-14-dya    | 0   |      |                       |          |          |       |                          |          |          |       |
| mir-31a-dan   | 5   | 690  | 636                   | 0.995558 | 0.997459 | 0.790 | 649                      | 0.99201  | 0.998077 | 0.827 |
| mir-31a-der   | 2   | 65   | 63                    | 0.996444 | 0.989186 | 0.254 | 51                       | 0.997293 | 0.999658 | 0.800 |
| mir-31a-dgr   | –   |      |                       |          |          |       |                          |          |          |       |
| mir-31a-dme   | 0   |      |                       |          |          |       |                          |          |          |       |
| mir-31a-dmo   | –   |      |                       |          |          |       |                          |          |          |       |
| mir-31a-dpe   | 0   |      |                       |          |          |       |                          |          |          |       |
| mir-31a-dps   | 0   |      |                       |          |          |       |                          |          |          |       |
| mir-31a-dse   | 0   |      |                       |          |          |       |                          |          |          |       |
| mir-31a-dsi   | 0   |      |                       |          |          |       |                          |          |          |       |
| mir-31a-dvi   | 1   | 64   | 63                    | 0.987724 | 0.988342 | 0.648 | 64                       | 0.993934 | 0.993912 | 0.469 |
| mir-31a-dwi   | –   |      |                       |          |          |       |                          |          |          |       |
| mir-31a-dya   | 2   | 132  | 119                   | 0.996444 | 0.990359 | 0.178 | 124                      | 0.997298 | 0.997674 | 0.629 |
| mir-31b-dan   | –   |      |                       |          |          |       |                          |          |          |       |
| mir-31b-der   | 0   |      |                       |          |          |       |                          |          |          |       |
| mir-31b-dgr   | –   |      |                       |          |          |       |                          |          |          |       |
| mir-31b-dme   | 3   | 1000 | 943                   | 0.994547 | 0.986224 | 0.069 | 961                      | 0.994221 | 0.986593 | 0.162 |
| mir-31b-dmo   | –   |      |                       |          |          |       |                          |          |          |       |
| mir-31b-dpe   | –   |      |                       |          |          |       |                          |          |          |       |
| mir-31b-dps   | 0   |      |                       |          |          |       |                          |          |          |       |
| mir-31b-dse   | 0   |      |                       |          |          |       |                          |          |          |       |
| mir-31b-dsi   | 0   |      |                       |          |          |       |                          |          |          |       |
| mir-31b-dvi   | –   |      |                       |          |          |       |                          |          |          |       |
| mir-31b-dwi   | –   |      |                       |          |          |       |                          |          |          |       |
| mir-31b-dya   | 3   | 1000 | 946                   | 0.995563 | 0.991719 | 0.238 | 939                      | 0.99536  | 0.992949 | 0.290 |
| mir-33-dan    | –   |      |                       |          |          |       |                          |          |          |       |
| mir-33-der    | 0   |      |                       |          |          |       |                          |          |          |       |
| mir-33-dgr    | –   |      |                       |          |          |       |                          |          |          |       |
| mir-33-dme    | –   |      |                       |          |          |       |                          |          |          |       |
| mir-33-dmo    | 7   | 1000 | 931                   | 0.996741 | 0.997822 | 0.617 | 928                      | 0.998246 | 0.998571 | 0.809 |
| mir-33-dpe    | –   |      |                       |          |          |       |                          |          |          |       |



| micro-RNA   | Sub | Samp | Mutational Robustness |          |          |       | Environmental Robustness |          |          |       |
|-------------|-----|------|-----------------------|----------|----------|-------|--------------------------|----------|----------|-------|
|             |     |      | Uniq                  | Anc      | Desc     | Quant | Uniq                     | Anc      | Desc     | Quant |
| mir-33-dps  | 1   | 83   | 71                    | 0.997739 | 0.997738 | 0.584 | 79                       | 0.997084 | 0.997074 | 0.488 |
| mir-33-dse  | 0   |      |                       |          |          |       |                          |          |          |       |
| mir-33-dsi  | 0   |      |                       |          |          |       |                          |          |          |       |
| mir-33-dvi  | –   |      |                       |          |          |       |                          |          |          |       |
| mir-33-dwi  | –   |      |                       |          |          |       |                          |          |          |       |
| mir-33-dya  | 1   | 73   | 60                    | 0.998821 | 0.998705 | 0.473 | 61                       | 0.999233 | 0.999228 | 0.610 |
| mir-34-dan  | –   |      |                       |          |          |       |                          |          |          |       |
| mir-34-der  | 5   | 125  | 123                   | 0.998047 | 0.996201 | 0.832 | 119                      | 0.997109 | 0.998113 | 0.960 |
| mir-34-dgr  | 1   | 52   | 47                    | 0.9979   | 0.996613 | 0.337 | 49                       | 0.998176 | 0.998141 | 0.404 |
| mir-34-dme  | 0   |      |                       |          |          |       |                          |          |          |       |
| mir-34-dmo  | 2   | 956  | 845                   | 0.9979   | 0.99836  | 0.849 | 762                      | 0.99817  | 0.998581 | 0.830 |
| mir-34-dpe  | –   |      |                       |          |          |       |                          |          |          |       |
| mir-34-dps  | 0   |      |                       |          |          |       |                          |          |          |       |
| mir-34-dse  | 0   |      |                       |          |          |       |                          |          |          |       |
| mir-34-dsi  | 0   |      |                       |          |          |       |                          |          |          |       |
| mir-34-dvi  | 0   |      |                       |          |          |       |                          |          |          |       |
| mir-34-dwi  | –   |      |                       |          |          |       |                          |          |          |       |
| mir-34-dya  | 0   |      |                       |          |          |       |                          |          |          |       |
| mir-79-dan  | –   |      |                       |          |          |       |                          |          |          |       |
| mir-79-der  | 0   |      |                       |          |          |       |                          |          |          |       |
| mir-79-dgr  | –   |      |                       |          |          |       |                          |          |          |       |
| mir-79-dme  | –   |      |                       |          |          |       |                          |          |          |       |
| mir-79-dmo  | –   |      |                       |          |          |       |                          |          |          |       |
| mir-79-dpe  | –   |      |                       |          |          |       |                          |          |          |       |
| mir-79-dps  | 0   |      |                       |          |          |       |                          |          |          |       |
| mir-79-dse  | –   |      |                       |          |          |       |                          |          |          |       |
| mir-79-dvi  | 1   | 82   | 73                    | 0.999059 | 0.998967 | 0.213 | 66                       | 0.999124 | 0.999125 | 0.610 |
| mir-79-dya  | 1   | 87   | 69                    | 0.999314 | 0.997022 | 0.006 | 74                       | 0.99913  | 0.998986 | 0.138 |
| mir-87-dan  | –   |      |                       |          |          |       |                          |          |          |       |
| mir-87-der  | 0   |      |                       |          |          |       |                          |          |          |       |
| mir-87-dgr  | 0   |      |                       |          |          |       |                          |          |          |       |
| mir-87-dme  | –   |      |                       |          |          |       |                          |          |          |       |
| mir-87-dmo  | 2   | 10   | 10                    | 0.996012 | 0.996235 | 0.650 | 10                       | 0.993814 | 0.991281 | 0.600 |
| mir-87-dpe  | –   |      |                       |          |          |       |                          |          |          |       |
| mir-87-dps  | 0   |      |                       |          |          |       |                          |          |          |       |
| mir-87-dse  | 0   |      |                       |          |          |       |                          |          |          |       |
| mir-87-dsi  | 0   |      |                       |          |          |       |                          |          |          |       |
| mir-87-dvi  | 2   | 27   | 27                    | 0.996012 | 0.996664 | 0.685 | 27                       | 0.99381  | 0.993667 | 0.648 |
| mir-87-dya  | 4   | 1000 | 946                   | 0.996785 | 0.996274 | 0.868 | 950                      | 0.994591 | 0.993694 | 0.722 |
| mir-92a-dan | –   |      |                       |          |          |       |                          |          |          |       |
| mir-92a-der | 0   |      |                       |          |          |       |                          |          |          |       |
| mir-92a-dgr | –   |      |                       |          |          |       |                          |          |          |       |
| mir-92a-dme | 0   |      |                       |          |          |       |                          |          |          |       |
| mir-92a-dmo | 3   | 1000 | 846                   | 0.999    | 0.999165 | 0.990 | 881                      | 0.997487 | 0.998787 | 0.959 |
| mir-92a-dpe | –   |      |                       |          |          |       |                          |          |          |       |
| mir-92a-dps | 1   | 97   | 86                    | 0.997894 | 0.997914 | 0.716 | 96                       | 0.996057 | 0.995134 | 0.165 |
| mir-92a-dse | 0   |      |                       |          |          |       |                          |          |          |       |
| mir-92a-dsi | 0   |      |                       |          |          |       |                          |          |          |       |
| mir-92a-dvi | –   |      |                       |          |          |       |                          |          |          |       |
| mir-92a-dwi | –   |      |                       |          |          |       |                          |          |          |       |
| mir-92a-dya | 1   | 72   | 60                    | 0.998974 | 0.998929 | 0.465 | 63                       | 0.998622 | 0.998922 | 0.986 |
| mir-92b-dan | –   |      |                       |          |          |       |                          |          |          |       |
| mir-92b-der | 0   |      |                       |          |          |       |                          |          |          |       |
| mir-92b-dgr | 1   | 62   | 53                    | 0.995909 | 0.995905 | 0.411 | 61                       | 0.995986 | 0.996127 | 0.694 |
| mir-92b-dme | 2   | 6    | 6                     | 0.996849 | 0.99686  | 0.417 | 6                        | 0.991051 | 0.994287 | 0.500 |

| micro-RNA   | Sub | Samp | Mutational Robustness |          |          |       | Environmental Robustness |          |          |       |
|-------------|-----|------|-----------------------|----------|----------|-------|--------------------------|----------|----------|-------|
|             |     |      | Uniq                  | Anc      | Desc     | Quant | Uniq                     | Anc      | Desc     | Quant |
| mir-92b-dmo | 0   |      |                       |          |          |       |                          |          |          |       |
| mir-92b-dpe | –   |      |                       |          |          |       |                          |          |          |       |
| mir-92b-dps | 0   |      |                       |          |          |       |                          |          |          |       |
| mir-92b-dse | 0   |      |                       |          |          |       |                          |          |          |       |
| mir-92b-dsi | 0   |      |                       |          |          |       |                          |          |          |       |
| mir-92b-dvi | 1   | 2    | 2                     | 0.995909 | 0.996536 | 0.250 | 2                        | 0.995975 | 0.995154 | 0.000 |
| mir-92b-dwi | 7   | 0    | 0                     | 0.995246 | 0.996559 | —     | 0                        | 0.997078 | 0.993696 | —     |
| mir-92b-dya | 0   |      |                       |          |          |       |                          |          |          |       |
| mir-100-dan | –   |      |                       |          |          |       |                          |          |          |       |
| mir-100-der | 0   |      |                       |          |          |       |                          |          |          |       |
| mir-100-dgr | 1   | 76   | 69                    | 0.997432 | 0.997302 | 0.375 | 72                       | 0.998462 | 0.998473 | 0.717 |
| mir-100-dme | 0   |      |                       |          |          |       |                          |          |          |       |
| mir-100-dmo | 0   |      |                       |          |          |       |                          |          |          |       |
| mir-100-dps | 1   | 2    | 2                     | 0.986035 | 0.993409 | 0.250 | 2                        | 0.992355 | 0.993557 | 0.500 |
| mir-100-dse | 0   |      |                       |          |          |       |                          |          |          |       |
| mir-100-dsi | 0   |      |                       |          |          |       |                          |          |          |       |
| mir-100-dvi | 0   |      |                       |          |          |       |                          |          |          |       |
| mir-100-dwi | 0   |      |                       |          |          |       |                          |          |          |       |
| mir-100-dya | 0   |      |                       |          |          |       |                          |          |          |       |
| mir-124-dan | 0   |      |                       |          |          |       |                          |          |          |       |
| mir-124-der | 0   |      |                       |          |          |       |                          |          |          |       |
| mir-124-dgr | –   |      |                       |          |          |       |                          |          |          |       |
| mir-124-dme | –   |      |                       |          |          |       |                          |          |          |       |
| mir-124-dmo | 0   |      |                       |          |          |       |                          |          |          |       |
| mir-124-dpe | –   |      |                       |          |          |       |                          |          |          |       |
| mir-124-dps | 0   |      |                       |          |          |       |                          |          |          |       |
| mir-124-dse | 0   |      |                       |          |          |       |                          |          |          |       |
| mir-124-dsi | 0   |      |                       |          |          |       |                          |          |          |       |
| mir-124-dvi | 0   |      |                       |          |          |       |                          |          |          |       |
| mir-124-dwi | –   |      |                       |          |          |       |                          |          |          |       |
| mir-124-dya | 0   |      |                       |          |          |       |                          |          |          |       |
| mir-125-dan | 0   |      |                       |          |          |       |                          |          |          |       |
| mir-125-der | 0   |      |                       |          |          |       |                          |          |          |       |
| mir-125-dme | 0   |      |                       |          |          |       |                          |          |          |       |
| mir-125-dmo | 0   |      |                       |          |          |       |                          |          |          |       |
| mir-125-dps | 0   |      |                       |          |          |       |                          |          |          |       |
| mir-125-dse | 0   |      |                       |          |          |       |                          |          |          |       |
| mir-125-dsi | 0   |      |                       |          |          |       |                          |          |          |       |
| mir-125-dvi | 0   |      |                       |          |          |       |                          |          |          |       |
| mir-125-dwi | 0   |      |                       |          |          |       |                          |          |          |       |
| mir-125-dya | 0   |      |                       |          |          |       |                          |          |          |       |
| mir-133-dan | –   |      |                       |          |          |       |                          |          |          |       |
| mir-133-der | –   |      |                       |          |          |       |                          |          |          |       |
| mir-133-dgr | 2   | 2473 | 1678                  | 0.996496 | 0.995172 | 0.247 | 1771                     | 0.996234 | 0.993128 | 0.128 |
| mir-133-dme | –   |      |                       |          |          |       |                          |          |          |       |
| mir-133-dmo | –   |      |                       |          |          |       |                          |          |          |       |
| mir-133-dpe | –   |      |                       |          |          |       |                          |          |          |       |
| mir-133-dps | 0   |      |                       |          |          |       |                          |          |          |       |
| mir-133-dse | 0   |      |                       |          |          |       |                          |          |          |       |
| mir-133-dsi | 0   |      |                       |          |          |       |                          |          |          |       |
| mir-133-dvi | 4   | 1000 | 941                   | 0.996354 | 0.99313  | 0.237 | 918                      | 0.996222 | 0.989908 | 0.096 |
| mir-133-dwi | –   |      |                       |          |          |       |                          |          |          |       |
| mir-133-dya | 0   |      |                       |          |          |       |                          |          |          |       |
| mir-184-dan | –   |      |                       |          |          |       |                          |          |          |       |
| mir-184-der | 0   |      |                       |          |          |       |                          |          |          |       |

| micro-RNA    | Sub | Samp | Mutational Robustness |          |          |       | Environmental Robustness |          |          |       |
|--------------|-----|------|-----------------------|----------|----------|-------|--------------------------|----------|----------|-------|
|              |     |      | Uniq                  | Anc      | Desc     | Quant | Uniq                     | Anc      | Desc     | Quant |
| mir-184-dgr  | –   |      |                       |          |          |       |                          |          |          |       |
| mir-184-dme  | 1   | 78   | 75                    | 0.994969 | 0.994993 | 0.558 | 76                       | 0.994924 | 0.994756 | 0.423 |
| mir-184-dmo  | 1   | 4    | 4                     | 0.994323 | 0.996945 | 0.125 | 4                        | 0.998456 | 0.9936   | 0.250 |
| mir-184-dpe  | –   |      |                       |          |          |       |                          |          |          |       |
| mir-184-dps  | 0   |      |                       |          |          |       |                          |          |          |       |
| mir-184-dse  | 0   |      |                       |          |          |       |                          |          |          |       |
| mir-184-dsi  | 0   |      |                       |          |          |       |                          |          |          |       |
| mir-184-dvi  | 0   |      |                       |          |          |       |                          |          |          |       |
| mir-184-dwi  | –   |      |                       |          |          |       |                          |          |          |       |
| mir-184-dya  | –   |      |                       |          |          |       |                          |          |          |       |
| mir-210-dan  | –   |      |                       |          |          |       |                          |          |          |       |
| mir-210-der  | 0   |      |                       |          |          |       |                          |          |          |       |
| mir-210-dgr  | –   |      |                       |          |          |       |                          |          |          |       |
| mir-210-dme  | –   |      |                       |          |          |       |                          |          |          |       |
| mir-210-dmo  | 2   | 222  | 193                   | 0.996383 | 0.996535 | 0.052 | 190                      | 0.995623 | 0.997559 | 0.180 |
| mir-210-dpe  | –   |      |                       |          |          |       |                          |          |          |       |
| mir-210-dps  | 0   |      |                       |          |          |       |                          |          |          |       |
| mir-210-dse  | 0   |      |                       |          |          |       |                          |          |          |       |
| mir-210-dsi  | 0   |      |                       |          |          |       |                          |          |          |       |
| mir-210-dvi  | –   |      |                       |          |          |       |                          |          |          |       |
| mir-210-dwi  | 1   | 74   | 72                    | 0.994133 | 0.996324 | 0.899 | 73                       | 0.995357 | 0.99511  | 0.311 |
| mir-210-dya  | 1   | 74   | 69                    | 0.993343 | 0.99657  | 0.912 | 72                       | 0.995041 | 0.995098 | 0.595 |
| mir-219-dan  | –   |      |                       |          |          |       |                          |          |          |       |
| mir-219-der  | 0   |      |                       |          |          |       |                          |          |          |       |
| mir-219-dgr  | –   |      |                       |          |          |       |                          |          |          |       |
| mir-219-dme  | 0   |      |                       |          |          |       |                          |          |          |       |
| mir-219-dmo  | –   |      |                       |          |          |       |                          |          |          |       |
| mir-219-dpe  | –   |      |                       |          |          |       |                          |          |          |       |
| mir-219-dps  | 0   |      |                       |          |          |       |                          |          |          |       |
| mir-219-dse  | 1   | 72   | 62                    | 0.997663 | 0.998076 | 0.951 | 72                       | 0.991794 | 0.992426 | 0.708 |
| mir-219-dsi  | 0   |      |                       |          |          |       |                          |          |          |       |
| mir-219-dvi  | 1   | 6    | 5                     | 0.996158 | 0.996164 | 0.833 | 6                        | 0.992952 | 0.992955 | 0.333 |
| mir-219-dwi  | 1   | 4    | 4                     | 0.997931 | 0.997908 | 0.875 | 4                        | 0.994261 | 0.99372  | 0.750 |
| mir-219-dya  | 0   |      |                       |          |          |       |                          |          |          |       |
| mir-263a-dan | –   |      |                       |          |          |       |                          |          |          |       |
| mir-263a-der | 1   | 1    | 1                     | 0.997731 | 0.997247 | 0.500 | 1                        | 0.995038 | 0.994447 | 0.000 |
| mir-263a-dgr | 1   | 71   | 63                    | 0.997247 | 0.997222 | 0.444 | 71                       | 0.992668 | 0.992606 | 0.324 |
| mir-263a-dme | –   |      |                       |          |          |       |                          |          |          |       |
| mir-263a-dmo | 1   | 71   | 63                    | 0.997247 | 0.997247 | 0.542 | 66                       | 0.99267  | 0.992658 | 0.408 |
| mir-263a-dpe | –   |      |                       |          |          |       |                          |          |          |       |
| mir-263a-dps | 0   |      |                       |          |          |       |                          |          |          |       |
| mir-263a-dse | 1   | 86   | 72                    | 0.997732 | 0.997919 | 0.855 | 84                       | 0.994509 | 0.995398 | 0.826 |
| mir-263a-dsi | 0   |      |                       |          |          |       |                          |          |          |       |
| mir-263a-dvi | 1   | 71   | 63                    | 0.997247 | 0.997247 | 0.542 | 66                       | 0.992659 | 0.992676 | 0.549 |
| mir-263a-dwi | –   |      |                       |          |          |       |                          |          |          |       |
| mir-263a-dya | 0   |      |                       |          |          |       |                          |          |          |       |
| mir-263b-dan | –   |      |                       |          |          |       |                          |          |          |       |
| mir-263b-der | –   |      |                       |          |          |       |                          |          |          |       |
| mir-263b-dgr | 2   | 384  | 261                   | 0.998434 | 0.998688 | 0.970 | 318                      | 0.998307 | 0.998728 | 0.917 |
| mir-263b-dme | 0   |      |                       |          |          |       |                          |          |          |       |
| mir-263b-dpe | 1   | 5    | 5                     | 0.998475 | 0.998236 | 0.100 | 5                        | 0.996206 | 0.994773 | 0.200 |
| mir-263b-dps | –   |      |                       |          |          |       |                          |          |          |       |
| mir-263b-dse | 0   |      |                       |          |          |       |                          |          |          |       |
| mir-263b-dsi | 0   |      |                       |          |          |       |                          |          |          |       |
| mir-263b-dvi | –   |      |                       |          |          |       |                          |          |          |       |

| micro-RNA    | Sub | Samp | Mutational Robustness |          |          |       | Environmental Robustness |          |          |       |
|--------------|-----|------|-----------------------|----------|----------|-------|--------------------------|----------|----------|-------|
|              |     |      | Uniq                  | Anc      | Desc     | Quant | Uniq                     | Anc      | Desc     | Quant |
| mir-263b-dwi | -   |      |                       |          |          |       |                          |          |          |       |
| mir-274-dan  | -   |      |                       |          |          |       |                          |          |          |       |
| mir-274-der  | 0   |      |                       |          |          |       |                          |          |          |       |
| mir-274-dgr  | -   |      |                       |          |          |       |                          |          |          |       |
| mir-274-dme  | 1   | 75   | 61                    | 0.999082 | 0.999048 | 0.313 | 56                       | 0.99918  | 0.999121 | 0.207 |
| mir-274-dmo  | -   |      |                       |          |          |       |                          |          |          |       |
| mir-274-dpe  | -   |      |                       |          |          |       |                          |          |          |       |
| mir-274-dps  | 0   |      |                       |          |          |       |                          |          |          |       |
| mir-274-dse  | -   |      |                       |          |          |       |                          |          |          |       |
| mir-274-dvi  | 2   | 76   | 63                    | 0.998025 | 0.992638 | 0.059 | 69                       | 0.996582 | 0.994549 | 0.145 |
| mir-274-dwi  | -   |      |                       |          |          |       |                          |          |          |       |
| mir-274-dya  | 1   | 66   | 57                    | 0.998994 | 0.999458 | 0.902 | 53                       | 0.999128 | 0.999145 | 0.833 |
| mir-275-dan  | -   |      |                       |          |          |       |                          |          |          |       |
| mir-275-der  | 0   |      |                       |          |          |       |                          |          |          |       |
| mir-275-dgr  | 2   | 455  | 415                   | 0.996477 | 0.996384 | 0.499 | 417                      | 0.998087 | 0.998199 | 0.651 |
| mir-275-dme  | -   |      |                       |          |          |       |                          |          |          |       |
| mir-275-dmo  | 3   | 1000 | 919                   | 0.996477 | 0.996779 | 0.599 | 916                      | 0.998081 | 0.998993 | 0.943 |
| mir-275-dpe  | -   |      |                       |          |          |       |                          |          |          |       |
| mir-275-dps  | 0   |      |                       |          |          |       |                          |          |          |       |
| mir-275-dse  | 1   | 3    | 3                     | 0.999298 | 0.998698 | 0.167 | 3                        | 0.99951  | 0.998306 | 0.167 |
| mir-275-dsi  | 0   |      |                       |          |          |       |                          |          |          |       |
| mir-275-dvi  | 2   | 83   | 75                    | 0.996477 | 0.995685 | 0.590 | 77                       | 0.998087 | 0.997866 | 0.578 |
| mir-275-dwi  | -   |      |                       |          |          |       |                          |          |          |       |
| mir-275-dya  | 1   | 95   | 79                    | 0.999274 | 0.999274 | 0.663 | 73                       | 0.999647 | 0.999647 | 0.600 |
| mir-276a-dan | -   |      |                       |          |          |       |                          |          |          |       |
| mir-276a-der | 0   |      |                       |          |          |       |                          |          |          |       |
| mir-276a-dgr | 3   | 1000 | 573                   | 0.99883  | 0.998654 | 0.505 | 707                      | 0.999025 | 0.998045 | 0.293 |
| mir-276a-dme | -   |      |                       |          |          |       |                          |          |          |       |
| mir-276a-dmo | 1   | 86   | 68                    | 0.99883  | 0.998832 | 0.605 | 70                       | 0.999024 | 0.999126 | 0.785 |
| mir-276a-dpe | 0   |      |                       |          |          |       |                          |          |          |       |
| mir-276a-dps | -   |      |                       |          |          |       |                          |          |          |       |
| mir-276a-dse | 0   |      |                       |          |          |       |                          |          |          |       |
| mir-276a-dsi | 0   |      |                       |          |          |       |                          |          |          |       |
| mir-276a-dvi | 0   |      |                       |          |          |       |                          |          |          |       |
| mir-276a-dwi | 1   | 87   | 72                    | 0.998746 | 0.998746 | 0.489 | 75                       | 0.99881  | 0.998805 | 0.466 |
| mir-276a-dya | 0   |      |                       |          |          |       |                          |          |          |       |
| mir-276b-dan | -   |      |                       |          |          |       |                          |          |          |       |
| mir-276b-der | 0   |      |                       |          |          |       |                          |          |          |       |
| mir-276b-dgr | 1   | 98   | 80                    | 0.998617 | 0.998913 | 0.883 | 80                       | 0.999367 | 0.999385 | 0.755 |
| mir-276b-dme | -   |      |                       |          |          |       |                          |          |          |       |
| mir-276b-dmo | 1   | 98   | 79                    | 0.998402 | 0.998252 | 0.281 | 90                       | 0.999397 | 0.999286 | 0.286 |
| mir-276b-dpe | -   |      |                       |          |          |       |                          |          |          |       |
| mir-276b-dps | 0   |      |                       |          |          |       |                          |          |          |       |
| mir-276b-dse | 0   |      |                       |          |          |       |                          |          |          |       |
| mir-276b-dsi | 0   |      |                       |          |          |       |                          |          |          |       |
| mir-276b-dvi | 1   | 98   | 79                    | 0.998402 | 0.998269 | 0.301 | 87                       | 0.999397 | 0.99934  | 0.337 |
| mir-276b-dwi | 2   | 4814 | 1026                  | 0.999271 | 0.999376 | 0.904 | 1202                     | 0.999528 | 0.99954  | 0.743 |
| mir-276b-dya | 0   |      |                       |          |          |       |                          |          |          |       |
| mir-277-dan  | -   |      |                       |          |          |       |                          |          |          |       |
| mir-277-der  | 0   |      |                       |          |          |       |                          |          |          |       |
| mir-277-dgr  | 0   |      |                       |          |          |       |                          |          |          |       |
| mir-277-dme  | 0   |      |                       |          |          |       |                          |          |          |       |
| mir-277-dmo  | -   |      |                       |          |          |       |                          |          |          |       |
| mir-277-dpe  | -   |      |                       |          |          |       |                          |          |          |       |
| mir-277-dps  | 0   |      |                       |          |          |       |                          |          |          |       |

| micro-RNA     | Sub | Samp | Mutational Robustness |          |          |       | Environmental Robustness |          |          |       |
|---------------|-----|------|-----------------------|----------|----------|-------|--------------------------|----------|----------|-------|
|               |     |      | Uniq                  | Anc      | Desc     | Quant | Uniq                     | Anc      | Desc     | Quant |
| mir-277-dse   | 0   |      |                       |          |          |       |                          |          |          |       |
| mir-277-dsi   | 4   | 1000 | 678                   | 0.999055 | 0.995998 | 0.020 | 803                      | 0.998425 | 0.996959 | 0.080 |
| mir-277-dvi   | 0   |      |                       |          |          |       |                          |          |          |       |
| mir-277-dwi   | 3   | 1000 | 565                   | 0.999263 | 0.99929  | 0.832 | 705                      | 0.998088 | 0.998309 | 0.849 |
| mir-277-dya   | 0   |      |                       |          |          |       |                          |          |          |       |
| mir-278-dan   | –   |      |                       |          |          |       |                          |          |          |       |
| mir-278-der   | 0   |      |                       |          |          |       |                          |          |          |       |
| mir-278-dgr   | 3   | 1000 | 387                   | 0.997247 | 0.997201 | 0.821 | 788                      | 0.997139 | 0.996354 | 0.235 |
| mir-278-dme   | 1   | 89   | 78                    | 0.99713  | 0.997478 | 0.921 | 89                       | 0.994758 | 0.99479  | 0.551 |
| mir-278-dmo   | –   |      |                       |          |          |       |                          |          |          |       |
| mir-278-dpe   | –   |      |                       |          |          |       |                          |          |          |       |
| mir-278-dps   | 0   |      |                       |          |          |       |                          |          |          |       |
| mir-278-dse   | 0   |      |                       |          |          |       |                          |          |          |       |
| mir-278-dsi   | 0   |      |                       |          |          |       |                          |          |          |       |
| mir-278-dvi   | 1   | 76   | 69                    | 0.997155 | 0.99579  | 0.086 | 74                       | 0.997097 | 0.997266 | 0.704 |
| mir-278-dwi   | 4   | 1000 | 775                   | 0.997802 | 0.997926 | 0.391 | 861                      | 0.996728 | 0.996888 | 0.228 |
| mir-278-dya   | 0   |      |                       |          |          |       |                          |          |          |       |
| mir-279-dan   | –   |      |                       |          |          |       |                          |          |          |       |
| mir-279-der   | 0   |      |                       |          |          |       |                          |          |          |       |
| mir-279-dgr   | –   |      |                       |          |          |       |                          |          |          |       |
| mir-279-dme   | –   |      |                       |          |          |       |                          |          |          |       |
| mir-279-dmo   | 2   | 5    | 5                     | 0.996784 | 0.997223 | 0.900 | 5                        | 0.993873 | 0.996009 | 0.900 |
| mir-279-dpe   | –   |      |                       |          |          |       |                          |          |          |       |
| mir-279-dps   | 0   |      |                       |          |          |       |                          |          |          |       |
| mir-279-dse   | 0   |      |                       |          |          |       |                          |          |          |       |
| mir-279-dsi   | 0   |      |                       |          |          |       |                          |          |          |       |
| mir-279-dvi   | –   |      |                       |          |          |       |                          |          |          |       |
| mir-279-dwi   | –   |      |                       |          |          |       |                          |          |          |       |
| mir-279-dya   | 2   | 2957 | 1550                  | 0.994942 | 0.99617  | 0.728 | 2392                     | 0.988585 | 0.994806 | 0.687 |
| mir-280-dan   | –   |      |                       |          |          |       |                          |          |          |       |
| mir-280-der   | 1   | 2    | 2                     | 0.992234 | 0.993103 | 0.750 | 2                        | 0.989894 | 0.99287  | 0.000 |
| mir-280-dgr   | –   |      |                       |          |          |       |                          |          |          |       |
| mir-280-dme   | 1   | 78   | 70                    | 0.993286 | 0.986859 | 0.071 | 77                       | 0.986668 | 0.982474 | 0.103 |
| mir-280-dmo   | 2   | 8    | 8                     | 0.994258 | 0.997058 | 0.812 | 8                        | 0.990724 | 0.996248 | 0.875 |
| mir-280-dpe   | –   |      |                       |          |          |       |                          |          |          |       |
| mir-280-dps   | 0   |      |                       |          |          |       |                          |          |          |       |
| mir-280-dse   | –   |      |                       |          |          |       |                          |          |          |       |
| mir-280-dvi   | –   |      |                       |          |          |       |                          |          |          |       |
| mir-280-dwi   | –   |      |                       |          |          |       |                          |          |          |       |
| mir-280-dya   | –   |      |                       |          |          |       |                          |          |          |       |
| mir-281-1-dan | –   |      |                       |          |          |       |                          |          |          |       |
| mir-281-1-der | 0   |      |                       |          |          |       |                          |          |          |       |
| mir-281-1-dgr | 1   | 1    | 1                     | 0.998413 | 0.997959 | 0.500 | 1                        | 0.996996 | 0.997081 | 0.000 |
| mir-281-1-dme | 1   | 80   | 72                    | 0.9992   | 0.999185 | 0.581 | 78                       | 0.998313 | 0.998207 | 0.312 |
| mir-281-1-dmo | 2   | 2453 | 1330                  | 0.998619 | 0.998558 | 0.632 | 1684                     | 0.99812  | 0.998171 | 0.714 |
| mir-281-1-dpe | 0   |      |                       |          |          |       |                          |          |          |       |
| mir-281-1-dps | 0   |      |                       |          |          |       |                          |          |          |       |
| mir-281-1-dse | 0   |      |                       |          |          |       |                          |          |          |       |
| mir-281-1-dvi | 2   | 11   | 11                    | 0.998619 | 0.997987 | 0.591 | 11                       | 0.99812  | 0.996371 | 0.727 |
| mir-281-1-dwi | 5   | 1000 | 791                   | 0.998468 | 0.998722 | 0.769 | 901                      | 0.996252 | 0.997747 | 0.685 |
| mir-281-1-dya | 2   | 3304 | 1352                  | 0.9992   | 0.999138 | 0.608 | 1641                     | 0.998312 | 0.997792 | 0.252 |
| mir-281-2-dan | 1   | 10   | 10                    | 0.995786 | 0.996555 | 0.550 | 10                       | 0.994172 | 0.994633 | 0.500 |
| mir-281-2-der | 0   |      |                       |          |          |       |                          |          |          |       |
| mir-281-2-dgr | 1   | 73   | 69                    | 0.998487 | 0.998579 | 0.801 | 66                       | 0.998849 | 0.998997 | 0.877 |
| mir-281-2-dme | 0   |      |                       |          |          |       |                          |          |          |       |

| micro-RNA     | Sub | Samp | Mutational Robustness |          |          |       | Environmental Robustness |          |          |       |
|---------------|-----|------|-----------------------|----------|----------|-------|--------------------------|----------|----------|-------|
|               |     |      | Uniq                  | Anc      | Desc     | Quant | Uniq                     | Anc      | Desc     | Quant |
| mir-281-2-dmo | 2   | 19   | 19                    | 0.998487 | 0.998049 | 0.500 | 19                       | 0.998852 | 0.995247 | 0.211 |
| mir-281-2-dpe | 0   |      |                       |          |          |       |                          |          |          |       |
| mir-281-2-dps | 0   |      |                       |          |          |       |                          |          |          |       |
| mir-281-2-dse | 0   |      |                       |          |          |       |                          |          |          |       |
| mir-281-2-dvi | –   |      |                       |          |          |       |                          |          |          |       |
| mir-281-2-dwi | –   |      |                       |          |          |       |                          |          |          |       |
| mir-281-2-dya | 3   | 1000 | 789                   | 0.997388 | 0.998122 | 0.914 | 843                      | 0.993896 | 0.994452 | 0.552 |
| mir-282-dan   | –   |      |                       |          |          |       |                          |          |          |       |
| mir-282-der   | 1   | 5    | 4                     | 0.998846 | 0.999258 | 0.800 | 5                        | 0.99812  | 0.999142 | 0.200 |
| mir-282-dgr   | –   |      |                       |          |          |       |                          |          |          |       |
| mir-282-dme   | 1   | 75   | 61                    | 0.998597 | 0.998834 | 0.913 | 71                       | 0.997349 | 0.998337 | 0.933 |
| mir-282-dmo   | –   |      |                       |          |          |       |                          |          |          |       |
| mir-282-dpe   | –   |      |                       |          |          |       |                          |          |          |       |
| mir-282-dps   | 0   |      |                       |          |          |       |                          |          |          |       |
| mir-282-dse   | 1   | 75   | 61                    | 0.998597 | 0.998496 | 0.293 | 71                       | 0.997346 | 0.99626  | 0.067 |
| mir-282-dsi   | 0   |      |                       |          |          |       |                          |          |          |       |
| mir-282-dvi   | 1   | 80   | 68                    | 0.99902  | 0.998261 | 0.019 | 73                       | 0.997994 | 0.996758 | 0.087 |
| mir-282-dwi   | –   |      |                       |          |          |       |                          |          |          |       |
| mir-282-dya   | –   |      |                       |          |          |       |                          |          |          |       |
| mir-283-dan   | –   |      |                       |          |          |       |                          |          |          |       |
| mir-283-der   | 0   |      |                       |          |          |       |                          |          |          |       |
| mir-283-dgr   | –   |      |                       |          |          |       |                          |          |          |       |
| mir-283-dme   | –   |      |                       |          |          |       |                          |          |          |       |
| mir-283-dmo   | –   |      |                       |          |          |       |                          |          |          |       |
| mir-283-dpe   | –   |      |                       |          |          |       |                          |          |          |       |
| mir-283-dps   | 0   |      |                       |          |          |       |                          |          |          |       |
| mir-283-dse   | 0   |      |                       |          |          |       |                          |          |          |       |
| mir-283-dsi   | 0   |      |                       |          |          |       |                          |          |          |       |
| mir-283-dvi   | 0   |      |                       |          |          |       |                          |          |          |       |
| mir-283-dwi   | –   |      |                       |          |          |       |                          |          |          |       |
| mir-283-dya   | 0   |      |                       |          |          |       |                          |          |          |       |
| mir-284-dan   | –   |      |                       |          |          |       |                          |          |          |       |
| mir-284-der   | 0   |      |                       |          |          |       |                          |          |          |       |
| mir-284-dgr   | 2   | 146  | 132                   | 0.978105 | 0.96369  | 0.469 | 143                      | 0.983019 | 0.968075 | 0.219 |
| mir-284-dme   | 1   | 76   | 63                    | 0.991134 | 0.993837 | 0.941 | 74                       | 0.983973 | 0.989077 | 0.934 |
| mir-284-dmo   | 5   | 690  | 672                   | 0.978105 | 0.958677 | 0.022 | 667                      | 0.982991 | 0.968311 | 0.016 |
| mir-284-dpe   | –   |      |                       |          |          |       |                          |          |          |       |
| mir-284-dps   | 0   |      |                       |          |          |       |                          |          |          |       |
| mir-284-dse   | 0   |      |                       |          |          |       |                          |          |          |       |
| mir-284-dsi   | 0   |      |                       |          |          |       |                          |          |          |       |
| mir-284-dvi   | 1   | 2    | 2                     | 0.978105 | 0.972221 | 0.250 | 2                        | 0.983015 | 0.969783 | 0.250 |
| mir-284-dwi   | –   |      |                       |          |          |       |                          |          |          |       |
| mir-284-dya   | 0   |      |                       |          |          |       |                          |          |          |       |
| mir-285-dan   | –   |      |                       |          |          |       |                          |          |          |       |
| mir-285-der   | 3   | 1000 | 618                   | 0.998715 | 0.99842  | 0.818 | 823                      | 0.996955 | 0.996489 | 0.713 |
| mir-285-dgr   | –   |      |                       |          |          |       |                          |          |          |       |
| mir-285-dme   | 2   | 206  | 159                   | 0.998518 | 0.998649 | 0.488 | 191                      | 0.996263 | 0.998091 | 0.631 |
| mir-285-dmo   | –   |      |                       |          |          |       |                          |          |          |       |
| mir-285-dps   | 6   | 1000 | 819                   | 0.998633 | 0.997138 | 0.141 | 929                      | 0.998417 | 0.993222 | 0.107 |
| mir-285-dse   | 1   | 89   | 70                    | 0.998472 | 0.998014 | 0.051 | 83                       | 0.99619  | 0.995636 | 0.169 |
| mir-285-dsi   | 0   |      |                       |          |          |       |                          |          |          |       |
| mir-285-dvi   | 3   | 1000 | 727                   | 0.998311 | 0.998071 | 0.278 | 858                      | 0.9968   | 0.995816 | 0.372 |
| mir-285-dwi   | –   |      |                       |          |          |       |                          |          |          |       |
| mir-285-dya   | 1   | 100  | 75                    | 0.998715 | 0.998724 | 0.685 | 95                       | 0.99696  | 0.997354 | 0.820 |
| mir-286-dan   | –   |      |                       |          |          |       |                          |          |          |       |

| micro-RNA   | Sub | Samp | Mutational Robustness |          |          |       | Environmental Robustness |          |          |       |
|-------------|-----|------|-----------------------|----------|----------|-------|--------------------------|----------|----------|-------|
|             |     |      | Uniq                  | Anc      | Desc     | Quant | Uniq                     | Anc      | Desc     | Quant |
| mir-286-der | 2   | 1    | 1                     | 0.991552 | 0.98807  | 0.500 | 1                        | 0.990662 | 0.981107 | 1.000 |
| mir-286-dme | —   | —    | —                     | —        | —        | —     | —                        | —        | —        | —     |
| mir-286-dmo | 6   | 1000 | 931                   | 0.99518  | 0.997731 | 0.674 | 954                      | 0.992827 | 0.993928 | 0.527 |
| mir-286-dpe | —   | —    | —                     | —        | —        | —     | —                        | —        | —        | —     |
| mir-286-dps | 0   | —    | —                     | —        | —        | —     | —                        | —        | —        | —     |
| mir-286-dse | —   | —    | —                     | —        | —        | —     | —                        | —        | —        | —     |
| mir-286-dsi | 0   | —    | —                     | —        | —        | —     | —                        | —        | —        | —     |
| mir-286-dvi | —   | —    | —                     | —        | —        | —     | —                        | —        | —        | —     |
| mir-286-dwi | —   | —    | —                     | —        | —        | —     | —                        | —        | —        | —     |
| mir-286-dya | 1   | 77   | 76                    | 0.991552 | 0.9868   | 0.058 | 76                       | 0.990662 | 0.98337  | 0.026 |
| mir-287-dan | —   | —    | —                     | —        | —        | —     | —                        | —        | —        | —     |
| mir-287-der | 5   | 0    | 0                     | 0.911064 | 0.925945 | —     | 0                        | 0.968225 | 0.977545 | —     |
| mir-287-dme | —   | —    | —                     | —        | —        | —     | —                        | —        | —        | —     |
| mir-287-dmo | —   | —    | —                     | —        | —        | —     | —                        | —        | —        | —     |
| mir-287-dpe | —   | —    | —                     | —        | —        | —     | —                        | —        | —        | —     |
| mir-287-dps | 0   | —    | —                     | —        | —        | —     | —                        | —        | —        | —     |
| mir-287-dse | 0   | —    | —                     | —        | —        | —     | —                        | —        | —        | —     |
| mir-287-dsi | 0   | —    | —                     | —        | —        | —     | —                        | —        | —        | —     |
| mir-287-dvi | 0   | —    | —                     | —        | —        | —     | —                        | —        | —        | —     |
| mir-287-dwi | 7   | 647  | 645                   | 0.936672 | 0.961715 | 0.434 | 639                      | 0.961749 | 0.965901 | 0.258 |
| mir-287-dya | —   | —    | —                     | —        | —        | —     | —                        | —        | —        | —     |
| mir-288-dan | —   | —    | —                     | —        | —        | —     | —                        | —        | —        | —     |
| mir-288-der | 2   | 2    | 2                     | 0.93708  | 0.917895 | 0.250 | 2                        | 0.986905 | 0.950597 | 0.000 |
| mir-288-dgr | —   | —    | —                     | —        | —        | —     | —                        | —        | —        | —     |
| mir-288-dme | 2   | 2922 | 2884                  | 0.921466 | 0.899049 | 0.157 | 2863                     | 0.957292 | 0.942928 | 0.182 |
| mir-288-dmo | —   | —    | —                     | —        | —        | —     | —                        | —        | —        | —     |
| mir-288-dpe | 1   | 11   | 11                    | 0.995442 | 0.99507  | 0.409 | 11                       | 0.996643 | 0.997159 | 1.000 |
| mir-288-dps | 0   | —    | —                     | —        | —        | —     | —                        | —        | —        | —     |
| mir-288-dse | 0   | —    | —                     | —        | —        | —     | —                        | —        | —        | —     |
| mir-288-dsi | 0   | —    | —                     | —        | —        | —     | —                        | —        | —        | —     |
| mir-288-dvi | 2   | 10   | 10                    | 0.977506 | 0.904057 | 0.950 | 10                       | 0.991792 | 0.948236 | 0.900 |
| mir-288-dwi | —   | —    | —                     | —        | —        | —     | —                        | —        | —        | —     |
| mir-288-dya | —   | —    | —                     | —        | —        | —     | —                        | —        | —        | —     |
| mir-289-dan | —   | —    | —                     | —        | —        | —     | —                        | —        | —        | —     |
| mir-289-der | 2   | 3    | 3                     | 0.994721 | 0.995221 | 0.833 | 3                        | 0.99791  | 0.996921 | 0.667 |
| mir-289-dme | 1   | 1    | 1                     | 0.995074 | 0.988699 | 0.500 | 1                        | 0.997846 | 0.982899 | 0.500 |
| mir-289-dpe | —   | —    | —                     | —        | —        | —     | —                        | —        | —        | —     |
| mir-289-dps | 0   | —    | —                     | —        | —        | —     | —                        | —        | —        | —     |
| mir-289-dse | 0   | —    | —                     | —        | —        | —     | —                        | —        | —        | —     |
| mir-289-dsi | 0   | —    | —                     | —        | —        | —     | —                        | —        | —        | —     |
| mir-289-dya | 2   | 4    | 4                     | 0.994721 | 0.981842 | 0.875 | 4                        | 0.997906 | 0.991199 | 1.000 |
| mir-304-dan | 2   | 61   | 59                    | 0.995973 | 0.982074 | 0.074 | 61                       | 0.995568 | 0.994567 | 0.377 |
| mir-304-der | 0   | —    | —                     | —        | —        | —     | —                        | —        | —        | —     |
| mir-304-dgr | 2   | 74   | 70                    | 0.996514 | 0.997129 | 0.885 | 73                       | 0.995565 | 0.994552 | 0.635 |
| mir-304-dme | 1   | 65   | 61                    | 0.996823 | 0.996396 | 0.177 | 63                       | 0.998165 | 0.997298 | 0.200 |
| mir-304-dmo | 2   | 2139 | 1697                  | 0.996513 | 0.996814 | 0.798 | 1737                     | 0.995772 | 0.996158 | 0.703 |
| mir-304-dps | 4   | 1000 | 945                   | 0.995973 | 0.995547 | 0.506 | 917                      | 0.995569 | 0.997884 | 0.884 |
| mir-304-dse | 0   | —    | —                     | —        | —        | —     | —                        | —        | —        | —     |
| mir-304-dsi | 0   | —    | —                     | —        | —        | —     | —                        | —        | —        | —     |
| mir-304-dvi | 1   | 2    | 2                     | 0.996513 | 0.997689 | 0.750 | 2                        | 0.995771 | 0.9971   | 0.500 |
| mir-304-dwi | 8   | 0    | 0                     | 0.990366 | 0.995368 | —     | 0                        | 0.995493 | 0.995763 | —     |
| mir-304-dya | 0   | —    | —                     | —        | —        | —     | —                        | —        | —        | —     |
| mir-305-dan | 1   | 53   | 51                    | 0.996724 | 0.996315 | 0.462 | 52                       | 0.996504 | 0.995141 | 0.264 |
| mir-305-der | 1   | 47   | 46                    | 0.99564  | 0.990908 | 0.330 | 47                       | 0.992683 | 0.993501 | 0.809 |
| mir-305-dgr | 0   | —    | —                     | —        | —        | —     | —                        | —        | —        | —     |

| micro-RNA   | Sub | Samp | Mutational Robustness |          |          |       | Environmental Robustness |          |          |       |
|-------------|-----|------|-----------------------|----------|----------|-------|--------------------------|----------|----------|-------|
|             |     |      | Uniq                  | Anc      | Desc     | Quant | Uniq                     | Anc      | Desc     | Quant |
| mir-305-dme | 0   |      |                       |          |          |       |                          |          |          |       |
| mir-305-dmo | 3   | 1000 | 771                   | 0.996805 | 0.995346 | 0.208 | 798                      | 0.99592  | 0.99634  | 0.167 |
| mir-305-dpe | 0   |      |                       |          |          |       |                          |          |          |       |
| mir-305-dps | 0   |      |                       |          |          |       |                          |          |          |       |
| mir-305-dse | 0   |      |                       |          |          |       |                          |          |          |       |
| mir-305-dsi | –   |      |                       |          |          |       |                          |          |          |       |
| mir-305-dvi | 1   | 3    | 3                     | 0.996805 | 0.996622 | 0.500 | 3                        | 0.995922 | 0.993843 | 0.333 |
| mir-305-dwi | –   |      |                       |          |          |       |                          |          |          |       |
| mir-305-dya | 0   |      |                       |          |          |       |                          |          |          |       |
| mir-306-dan | 10  | 0    | 0                     | 0.998181 | 0.998441 | —     | 0                        | 0.997613 | 0.998444 | —     |
| mir-306-der | 0   |      |                       |          |          |       |                          |          |          |       |
| mir-306-dgr | –   |      |                       |          |          |       |                          |          |          |       |
| mir-306-dme | 0   |      |                       |          |          |       |                          |          |          |       |
| mir-306-dmo | –   |      |                       |          |          |       |                          |          |          |       |
| mir-306-dpe | 0   |      |                       |          |          |       |                          |          |          |       |
| mir-306-dps | 0   |      |                       |          |          |       |                          |          |          |       |
| mir-306-dse | –   |      |                       |          |          |       |                          |          |          |       |
| mir-306-dvi | 3   | 1000 | 541                   | 0.999224 | 0.998948 | 0.237 | 734                      | 0.999076 | 0.998908 | 0.489 |
| mir-306-dya | 1   | 2    | 2                     | 0.998008 | 0.998929 | 0.250 | 2                        | 0.996801 | 0.998559 | 0.500 |
| mir-307-dan | 0   |      |                       |          |          |       |                          |          |          |       |
| mir-307-der | 0   |      |                       |          |          |       |                          |          |          |       |
| mir-307-dgr | 0   |      |                       |          |          |       |                          |          |          |       |
| mir-307-dme | 0   |      |                       |          |          |       |                          |          |          |       |
| mir-307-dmo | 1   | 1    | 1                     | 0.9971   | 0.997866 | 0.500 | 1                        | 0.994734 | 0.994217 | 1.000 |
| mir-307-dpe | 0   |      |                       |          |          |       |                          |          |          |       |
| mir-307-dps | 0   |      |                       |          |          |       |                          |          |          |       |
| mir-307-dse | 0   |      |                       |          |          |       |                          |          |          |       |
| mir-307-dsi | 0   |      |                       |          |          |       |                          |          |          |       |
| mir-307-dvi | 1   | 6    | 6                     | 0.9971   | 0.995809 | 0.417 | 6                        | 0.994738 | 0.993918 | 0.167 |
| mir-307-dwi | –   |      |                       |          |          |       |                          |          |          |       |
| mir-307-dya | 0   |      |                       |          |          |       |                          |          |          |       |
| mir-308-dan | –   |      |                       |          |          |       |                          |          |          |       |
| mir-308-der | 1   | 2    | 2                     | 0.993205 | 0.992048 | 0.250 | 2                        | 0.996502 | 0.993014 | 0.500 |
| mir-308-dgr | 0   |      |                       |          |          |       |                          |          |          |       |
| mir-308-dme | 2   | 88   | 85                    | 0.993205 | 0.995202 | 0.562 | 86                       | 0.996497 | 0.998079 | 0.875 |
| mir-308-dmo | 2   | 989  | 715                   | 0.995847 | 0.996344 | 0.926 | 822                      | 0.995076 | 0.995387 | 0.644 |
| mir-308-dpe | 0   |      |                       |          |          |       |                          |          |          |       |
| mir-308-dps | 0   |      |                       |          |          |       |                          |          |          |       |
| mir-308-dse | 0   |      |                       |          |          |       |                          |          |          |       |
| mir-308-dsi | 0   |      |                       |          |          |       |                          |          |          |       |
| mir-308-dvi | 1   | 43   | 38                    | 0.995847 | 0.993445 | 0.105 | 42                       | 0.995071 | 0.994966 | 0.349 |
| mir-308-dwi | 5   | 1000 | 952                   | 0.994849 | 0.995887 | 0.643 | 957                      | 0.996837 | 0.997061 | 0.755 |
| mir-308-dya | 1   | 4    | 4                     | 0.993205 | 0.995177 | 0.875 | 4                        | 0.996492 | 0.996009 | 0.750 |
| mir-309-dan | 0   |      |                       |          |          |       |                          |          |          |       |
| mir-309-der | 0   |      |                       |          |          |       |                          |          |          |       |
| mir-309-dme | 0   |      |                       |          |          |       |                          |          |          |       |
| mir-309-dmo | 3   | 1000 | 692                   | 0.997246 | 0.997527 | 0.837 | 870                      | 0.99645  | 0.996912 | 0.739 |
| mir-309-dpe | 0   |      |                       |          |          |       |                          |          |          |       |
| mir-309-dps | 0   |      |                       |          |          |       |                          |          |          |       |
| mir-309-dse | 0   |      |                       |          |          |       |                          |          |          |       |
| mir-309-dsi | 0   |      |                       |          |          |       |                          |          |          |       |
| mir-309-dvi | –   |      |                       |          |          |       |                          |          |          |       |
| mir-309-dwi | –   |      |                       |          |          |       |                          |          |          |       |
| mir-309-dya | 1   | 3    | 3                     | 0.981819 | 0.974911 | 0.500 | 3                        | 0.990971 | 0.982599 | 0.333 |
| mir-314-dan | –   |      |                       |          |          |       |                          |          |          |       |



| micro-RNA   | Sub | Samp | Mutational Robustness |          |          |       | Environmental Robustness |          |          |       |
|-------------|-----|------|-----------------------|----------|----------|-------|--------------------------|----------|----------|-------|
|             |     |      | Uniq                  | Anc      | Desc     | Quant | Uniq                     | Anc      | Desc     | Quant |
| mir-314-der | 1   | 84   | 78                    | 0.997544 | 0.997194 | 0.339 | 80                       | 0.997652 | 0.997641 | 0.536 |
| mir-314-dgr | —   |      |                       |          |          |       |                          |          |          |       |
| mir-314-dme | 3   | 1000 | 471                   | 0.997416 | 0.992612 | 0.416 | 914                      | 0.997624 | 0.993108 | 0.695 |
| mir-314-dmo | —   |      |                       |          |          |       |                          |          |          |       |
| mir-314-dpe | 0   |      |                       |          |          |       |                          |          |          |       |
| mir-314-dps | 0   |      |                       |          |          |       |                          |          |          |       |
| mir-314-dse | 0   |      |                       |          |          |       |                          |          |          |       |
| mir-314-dsi | 0   |      |                       |          |          |       |                          |          |          |       |
| mir-314-dvi | —   |      |                       |          |          |       |                          |          |          |       |
| mir-314-dwi | 0   |      |                       |          |          |       |                          |          |          |       |
| mir-314-dya | 1   | 1    | 1                     | 0.997544 | 0.992386 | 0.500 | 1                        | 0.997649 | 0.989203 | 0.000 |
| mir-315-dan | 4   | 1000 | 535                   | 0.999259 | 0.998396 | 0.149 | 708                      | 0.998045 | 0.996871 | 0.157 |
| mir-315-der | —   |      |                       |          |          |       |                          |          |          |       |
| mir-315-dgr | 7   | 1000 | 658                   | 0.999408 | 0.999275 | 0.644 | 810                      | 0.999578 | 0.998781 | 0.470 |
| mir-315-dme | 1   | 68   | 54                    | 0.999273 | 0.999127 | 0.184 | 57                       | 0.9995   | 0.998793 | 0.029 |
| mir-315-dmo | —   |      |                       |          |          |       |                          |          |          |       |
| mir-315-dpe | 0   |      |                       |          |          |       |                          |          |          |       |
| mir-315-dps | 0   |      |                       |          |          |       |                          |          |          |       |
| mir-315-dse | —   |      |                       |          |          |       |                          |          |          |       |
| mir-315-dsi | 0   |      |                       |          |          |       |                          |          |          |       |
| mir-315-dwi | —   |      |                       |          |          |       |                          |          |          |       |
| mir-316-dan | 2   | 2268 | 1553                  | 0.998286 | 0.998568 | 0.904 | 1785                     | 0.996999 | 0.998269 | 0.924 |
| mir-316-der | 1   | 66   | 64                    | 0.997998 | 0.99776  | 0.326 | 64                       | 0.997112 | 0.996094 | 0.227 |
| mir-316-dgr | —   |      |                       |          |          |       |                          |          |          |       |
| mir-316-dme | 1   | 69   | 67                    | 0.996726 | 0.998159 | 0.833 | 69                       | 0.989549 | 0.99567  | 0.754 |
| mir-316-dmo | —   |      |                       |          |          |       |                          |          |          |       |
| mir-316-dpe | 0   |      |                       |          |          |       |                          |          |          |       |
| mir-316-dps | 0   |      |                       |          |          |       |                          |          |          |       |
| mir-316-dse | 0   |      |                       |          |          |       |                          |          |          |       |
| mir-316-dsi | 0   |      |                       |          |          |       |                          |          |          |       |
| mir-316-dvi | 0   |      |                       |          |          |       |                          |          |          |       |
| mir-316-dwi | 4   | 1000 | 890                   | 0.998286 | 0.99872  | 0.976 | 934                      | 0.996999 | 0.998668 | 0.982 |
| mir-317-dan | 4   | 0    | 0                     | 0.997208 | 0.997395 | —     | 0                        | 0.994829 | 0.995037 | —     |
| mir-317-der | 0   |      |                       |          |          |       |                          |          |          |       |
| mir-317-dgr | —   |      |                       |          |          |       |                          |          |          |       |
| mir-317-dme | 0   |      |                       |          |          |       |                          |          |          |       |
| mir-317-dmo | —   |      |                       |          |          |       |                          |          |          |       |
| mir-317-dps | 5   | 1000 | 965                   | 0.994307 | 0.993708 | 0.547 | 957                      | 0.991852 | 0.991955 | 0.463 |
| mir-317-dse | 0   |      |                       |          |          |       |                          |          |          |       |
| mir-317-dsi | 0   |      |                       |          |          |       |                          |          |          |       |
| mir-317-dvi | —   |      |                       |          |          |       |                          |          |          |       |
| mir-317-dwi | —   |      |                       |          |          |       |                          |          |          |       |
| mir-317-dya | 0   |      |                       |          |          |       |                          |          |          |       |
| mir-318-dan | 4   | 1000 | 707                   | 0.998565 | 0.998374 | 0.329 | 823                      | 0.997351 | 0.997011 | 0.215 |
| mir-318-der | 0   |      |                       |          |          |       |                          |          |          |       |
| mir-318-dgr | 0   |      |                       |          |          |       |                          |          |          |       |
| mir-318-dme | 0   |      |                       |          |          |       |                          |          |          |       |
| mir-318-dmo | 1   | 54   | 49                    | 0.995833 | 0.996204 | 0.806 | 51                       | 0.993864 | 0.993874 | 0.481 |
| mir-318-dpe | 0   |      |                       |          |          |       |                          |          |          |       |
| mir-318-dps | 0   |      |                       |          |          |       |                          |          |          |       |
| mir-318-dse | 0   |      |                       |          |          |       |                          |          |          |       |
| mir-318-dsi | 1   | 65   | 55                    | 0.999012 | 0.999342 | 0.946 | 57                       | 0.998381 | 0.998977 | 0.892 |
| mir-318-dvi | 0   |      |                       |          |          |       |                          |          |          |       |
| mir-318-dya | 2   | 2149 | 840                   | 0.999012 | 0.997752 | 0.023 | 1230                     | 0.998379 | 0.99498  | 0.024 |
